# Supplementary material for: Vertically aligned cerium hexaboride nanorods with enhanced field emission properties
Source: Royal Society of Chemistry journal article supplement (doi:10.1039/c2jm16538d), 2012-01-01
Supplement: c2jm16538d.pdf [file c2jm16538d.pdf]

Supporting information

Supplementary Figure

|          |                                                                                                                                    |
|----------|------------------------------------------------------------------------------------------------------------------------------------|
| Figure 1 | Transmission electron micrograph of cerium hexaboride obtained from (a) reverse micellar and (b) hydrothermal route after etching. |
|----------|------------------------------------------------------------------------------------------------------------------------------------|

Figures

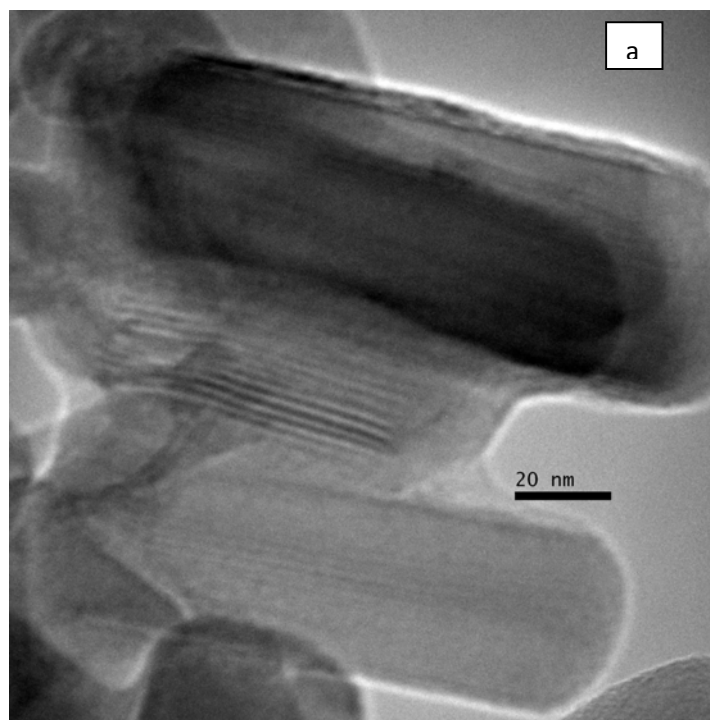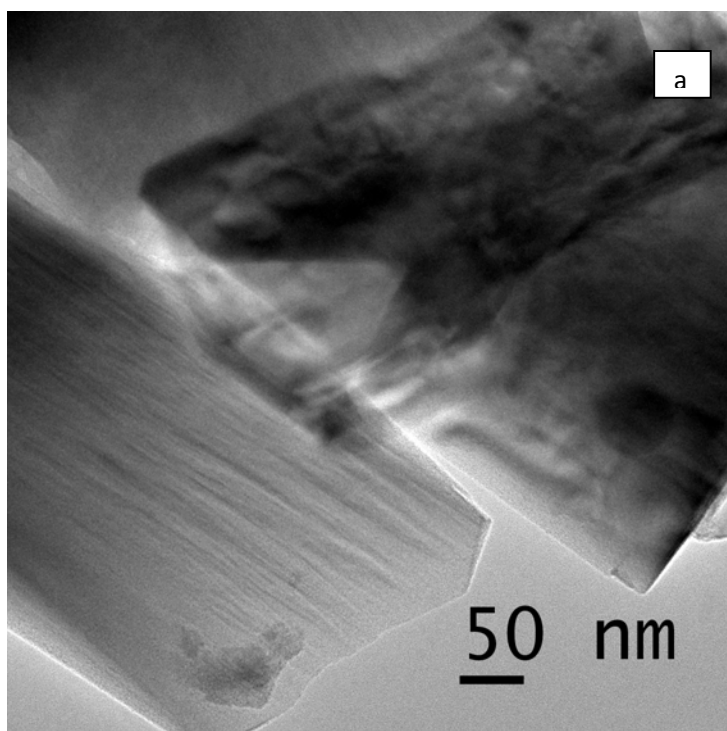

Figure S1
